# Supplementary material for: Stowaway miniature inverted repeat transposable elements are important agents driving recent genomic diversity in wild and cultivated carrot
Source: Mob DNA. 2019 Nov 27;10:47. doi: 10.1186/s13100-019-0190-3 (PMC6881990; doi:10.1186/s13100-019-0190-3)
Supplement: Supplementary file 3 — Additional file 3: Supplementary Table: contains a list of gene-associated parallel insertion sites (PIS) and their functional annotations. [file 13100_2019_190_MOESM3_ESM.xls]

## Sheet: Table_S_PIS
Supplementary Table S . Parallel insertion sites (PIS) localized within genic regions with annotation of related genes.
Chromosome	Position	DcSto	Region	LOC	Annotation	DcSto_genotype/s
DCARv2_Chr1	159367	DcSto8,DcSto2,	downstream	LOC108205018	galacturonosyltransferase 8-like	DcSto8_Ssp2_DcSto2_C8
DCARv2_Chr1	821943	DcSto7b,DcSto6,	upstream	LOC108209315	AT-hook motif nuclear-localized protein 5-like	DcSto7b_C12,C7_DcSto6_Ssp2
DCARv2_Chr1	828787	DcSto7b,DcSto2,	upstream	LOC108203489	uncharacterized LOC108203489	DcSto7b_W6_DcSto2_C4
DCARv2_Chr1	4777190	DcSto12,DcSto1,	5'UTR	LOC108203711	vacuolar protein sorting-associated protein 54, chloroplastic-like	DcSto12_I1,C13,Ssp4,W3_DcSto1_C10,C1,C4
DCARv2_Chr1	5133862	DcSto7b,DcSto7a,	upstream	LOC108204611	IRK-interacting protein-like	DcSto7b_Ssp4_DcSto7a_W2
DCARv2_Chr1	5884749	DcSto7a,DcSto1,	downstream	LOC108193695	uncharacterized LOC108193695	DcSto7a_C6_DcSto1_Ssp2,W2,
DCARv2_Chr1	10889410	DcSto12,DcSto6,	3'UTR	LOC108218275	uncharacterized LOC108218275	DcSto12_W5_DcSto6_W3
DCARv2_Chr1	13457678	DcSto6,DcSto2,	downstream	LOC108206634	nascent polypeptide-associated complex subunit beta-like	DcSto6_C12_DcSto2_C10
DCARv2_Chr1	14827535	DcSto8,DcSto1,	downstream	LOC108218959	citrate-binding protein-like	DcSto8_W2_DcSto1_I2,C9,C13,C10,C7,C4,
DCARv2_Chr1	14942956	DcSto6,DcSto2,	downstream	LOC108205296	probable mediator of RNA polymerase II transcription subunit 26c	DcSto6_W2_DcSto2_Ssp5
DCARv2_Chr1	16728528	DcSto6,DcSto5,	downstream	LOC108218274	aspartyl protease family protein 1	DcSto6_I3_DcSto5_C7,C8
DCARv2_Chr1	17618951	DcSto6,DcSto1,	upstream	LOC108206268	uncharacterized LOC108206268	DcSto6_Ssp3_DcSto1_W6
DCARv2_Chr1	28391005	DcSto7b,DcSto1,	upstream	LOC108209064	uncharacterized LOC108209064	DcSto7b_Ssp1,Ssp2_DcSto1_W2
DCARv2_Chr1	28406058	DcSto6,DcSto1,	downstream	LOC108204583	ethylene receptor 2-like	DcSto6_C9,C13,C12,C11,C10,C4_DcSto1_W3
DCARv2_Chr1	30242552	DcSto7b,DcSto6,	downstream	LOC108205400	hydroxyproline O-galactosyltransferase GALT3	DcSto7b_I2_DcSto6_Ssp4
DCARv2_Chr1	31668839	DcSto7b,DcSto5,	upstream	LOC108204514	probable xyloglucan endotransglucosylase/hydrolase protein 28	DcSto7b_C2_DcSto5_W6
DCARv2_Chr1	33937434	DcSto6,DcSto2,	downstream	LOC108214781	gibberellin 2-beta-dioxygenase 2-like	DcSto6_W3_DcSto2_Ssp3
DCARv2_Chr1	35303969	DcSto7b,DcSto12,DcSto7a	downstream	LOC108199103	ammonium transporter 3 member 1-like	DcSto12_I2,C11,C10,C3,C6_DcSto7a_W5,W4_DcSto7b_C1
DCARv2_Chr1	38337207	DcSto5,DcSto1,	intron	LOC108205012	dormancy-associated protein homolog 3-like	DcSto5_C9,C13,C10_DcSto1_C8
DCARv2_Chr1	38575346	DcSto6,DcSto2,	upstream	LOC108204744	probable polyamine oxidase 4	DcSto6_Ssp1_DcSto2_C5
DCARv2_Chr1	41238044	DcSto6,DcSto2,	upstream	LOC108194522	snakin-2-like	DcSto6_W3_DcSto2_C9
DCARv2_Chr1	45450470	DcSto6,DcSto1,	downstream	LOC108203756	putative receptor-like protein kinase At4g00960	DcSto6_C2,C4_DcSto1_W6
DCARv2_Chr1	46019650	DcSto1,DcSto1,	intron	LOC108209782	protein Brevis radix-like 1	0_DcSto1_W3
DCARv2_Chr1	47797730	DcSto7b,DcSto8,DcSto6	5'UTR	LOC108204290	eukaryotic initiation factor 4A-2-like	DcSto8_C7,W2_DcSto6_Ssp3_DcSto7b_C6
DCARv2_Chr1	48606938	DcSto6,DcSto1,	intron	LOC108205022	uncharacterized LOC108205022	DcSto6_C9,W6_DcSto1_W4
DCARv2_Chr2	4065521	DcSto6,DcSto4,	downstream	LOC108209251	protein kinase APK1A, chloroplastic-like	DcSto6_W2_DcSto4_W3
DCARv2_Chr2	8151719	DcSto2,DcSto6,DcSto1	upstream	LOC108209343	U-box domain-containing protein 17-like	DcSto6_I2,C13,C12,C11,C8,C5,C6_DcSto1_W2_DcSto2_C1
DCARv2_Chr2	10813587	DcSto12,DcSto6,	downstream	LOC108205630	chloroplast stem-loop binding protein of 41 kDa b, chloroplastic	DcSto12_C9,C7,C2,C3,C5,C4,W8,W6,W3_DcSto6_W2
DCARv2_Chr2	10925479	DcSto6,DcSto2,	intron	LOC108210196	ras-related protein RABA5c-like	DcSto6_Ssp4_DcSto2_C2,W8,W5
DCARv2_Chr2	18589495	DcSto6,DcSto5,	upstream	LOC108209614	zinc finger CCCH domain-containing protein 32-like	DcSto6_C5,W8,W4_DcSto5_W2
DCARv2_Chr2	18816698	DcSto7b,DcSto6,	intron	LOC108209720	nodulin homeobox-like	DcSto7b_C2_DcSto6_W2
DCARv2_Chr2	27156481	DcSto6,DcSto5,	intron	LOC108209330	zeta-carotene desaturase, chloroplastic/chromoplastic	DcSto6_Ssp4_DcSto5_W6
DCARv2_Chr2	28232186	DcSto6,DcSto5,	upstream	LOC108209244	tubulin beta chain-like	DcSto6_C5_DcSto5_C7,C3,C4
DCARv2_Chr2	28755702	DcSto6,DcSto3,	downstream	LOC108206411	peptidyl-tRNA hydrolase ICT1, mitochondrial	DcSto6_W5_DcSto3_I3
DCARv2_Chr2	28828955	DcSto6,DcSto1,	intron	LOC108210039	monocopper oxidase-like protein SKU5	DcSto6_W2_DcSto1_W2,Ssp3,
DCARv2_Chr2	30402050	DcSto2,DcSto7b,DcSto1	upstream	LOC108209513	uncharacterized protein At5g05190	DcSto7b_W7_DcSto1_C6_DcSto2_W2
DCARv2_Chr2	33314427	DcSto12,DcSto7a,	intron	LOC108206063	ubiquitin-conjugating enzyme E2 variant 1A-like	DcSto12_W3_DcSto7a_C6
DCARv2_Chr2	34123822	DcSto6,DcSto3,	upstream	LOC108209718	uncharacterized LOC108209718	DcSto6_C5_DcSto3_W7
DCARv2_Chr2	34702267	DcSto7a,DcSto6,	downstream	LOC108207998	cytochrome P450 94B3-like	DcSto7a_C5,C4_DcSto6_Ssp3
DCARv2_Chr2	34891626	DcSto8,DcSto3,	intron	LOC108205952	SWI/SNF complex subunit SWI3A	DcSto8_C13_DcSto3_I1,C6
DCARv2_Chr2	35043343	DcSto12,DcSto6,	intron	LOC108205602	probable 2,3-bisphosphoglycerate-independent phosphoglycerate mutase	DcSto12_C3,W6_DcSto6_W5
DCARv2_Chr2	37935198	DcSto4,DcSto1,	upstream	LOC108208154	protein TIFY 5A-like	DcSto4_W5,W7,W4_DcSto1_Ssp3
DCARv2_Chr2	38305903	DcSto7b,DcSto2,	5'UTR	LOC108209848	U-box domain-containing protein 17-like	DcSto7b_W7_DcSto2_W2
DCARv2_Chr2	38468894	DcSto6,DcSto2,	downstream	LOC108209125	serine/threonine-protein phosphatase BSL1-like	DcSto6_W2_DcSto2_Ssp3
DCARv2_Chr2	39818597	DcSto6,DcSto2,	upstream	LOC108208978	hypothetical protein	DcSto6_I1,I2,I4,C9_DcSto2_W1
DCARv2_Chr2	40122004	DcSto2,DcSto1,	upstream	LOC108207823	probable pectate lyase 16	DcSto2_Ssp2_DcSto1_W2
DCARv2_Chr2	40834322	DcSto6,DcSto2,	downstream	LOC108210161	uncharacterized LOC108210161	DcSto6_W2_DcSto2_Ssp5
DCARv2_Chr2	50917940	DcSto5,DcSto2,	5'UTR	LOC108196475	putative quinone-oxidoreductase homolog, chloroplastic	DcSto5_I2,I4_DcSto2_W2
DCARv2_Chr3	95937	DcSto7b,DcSto6,	5'UTR	LOC108211866	fatty acid desaturase 4, chloroplastic	DcSto7b_I3_DcSto6_W1,W2
DCARv2_Chr3	178090	DcSto7b,DcSto2,	downstream	LOC108214440	G-type lectin S-receptor-like serine/threonine-protein kinase At4g27290	DcSto7b_C2_DcSto2_I1,I4,C11
DCARv2_Chr3	1306508	DcSto12,DcSto6,	upstream	LOC108213338	patatin-like protein 2	DcSto12_I1,I4,C12,W2_DcSto6_Ssp5
DCARv2_Chr3	2081836	DcSto7a,DcSto6,	upstream	LOC108214418	probable transcriptional regulator SLK2	DcSto7a_C10_DcSto6_C5,C6
DCARv2_Chr3	2177106	DcSto8,DcSto7b,	upstream	LOC108214462	serine/arginine-rich splicing factor RS31-like	DcSto8_Ssp1_DcSto7b_W2
DCARv2_Chr3	5832878	DcSto8,DcSto5,	upstream	LOC108214706	uncharacterized LOC108214706	DcSto8_Ssp5_DcSto5_C11,C10
DCARv2_Chr3	6937350	DcSto1,DcSto7a,	upstream	LOC108214628	golgin subfamily B member 1	DcSto10_C5,C1,C6_DcSto7a_Ssp5
DCARv2_Chr3	9016954	DcSto12,DcSto6,	intron	LOC108215207	blue copper protein-like	DcSto12_W2_DcSto6_W5
DCARv2_Chr3	9862076	DcSto7a,DcSto6,	upstream	LOC108211356	glucan endo-1,3-beta-glucosidase 8-like	DcSto7a_Ssp1_DcSto6_W2
DCARv2_Chr3	13100717	DcSto7b,DcSto5,	upstream	LOC108211741	uncharacterized LOC108211741	DcSto7b_C1_DcSto5_W7
DCARv2_Chr3	14135937	DcSto6,DcSto2,	intron	LOC108210479	uncharacterized LOC108210479	DcSto6_I1,C1,W5_DcSto2_Ssp4
DCARv2_Chr3	14361534	DcSto2,DcSto1,	intron	LOC108215009	tRNA threonylcarbamoyladenosine dehydratase	DcSto2_Ssp1_DcSto1_C13,C10,
DCARv2_Chr3	24969897	DcSto1,DcSto8,	downstream	LOC108213312	inositol-tetrakisphosphate 1-kinase 1-like	DcSto10_W7_DcSto8_Ssp3
DCARv2_Chr3	25732450	DcSto5,DcSto2,	upstream	LOC108210422	two-component response regulator-like APRR3	DcSto5_W2_DcSto2_C5,C6
DCARv2_Chr3	29231796	DcSto12,DcSto7b,	upstream	LOC108211523	probable N-acetyltransferase HLS1	DcSto12_W4_DcSto7b_C6
DCARv2_Chr3	31414343	DcSto7a,DcSto6,	intron	LOC108215433	putative F-box protein At1g67390	DcSto7a_Ssp5_DcSto6_I3,I1,C8,W5
DCARv2_Chr3	32240034	DcSto1,DcSto2,	intron	LOC108210736	gibberellin-regulated protein 6-like	DcSto10_I3,I1,I2,I4,C9,C12,C3,C5_DcSto2_Ssp5
DCARv2_Chr3	35962378	DcSto6,DcSto5,	intron	LOC108210899	prostatic spermine-binding protein-like	DcSto6_Ssp3_DcSto5_C2,C1,C4
DCARv2_Chr3	38949467	DcSto7b,DcSto1,	3'UTR	LOC108213646	tryptophan aminotransferase-related protein 4-like	DcSto7b_W7_DcSto1_Ssp3
DCARv2_Chr3	39580679	DcSto6,DcSto2,	downstream	LOC108213317	uncharacterized LOC108213317	DcSto6_Ssp5_DcSto2_C2
DCARv2_Chr3	41346468	DcSto6,DcSto2,	downstream	LOC108206037	50S ribosomal protein L19-1, chloroplastic-like	DcSto6_Ssp1_DcSto2_C4,W4
DCARv2_Chr3	41476559	DcSto6,DcSto5,	upstream	LOC108210436	uncharacterized LOC108210436	DcSto6_I2,C9,C12_DcSto5_C3
DCARv2_Chr3	41677033	DcSto5,DcSto2,	5'UTR	LOC108214534	putative pentatricopeptide repeat-containing protein At3g25970	DcSto5_I2_DcSto2_W1
DCARv2_Chr3	42502753	DcSto8,DcSto6,	upstream	LOC108211616	putative transcription factor bHLH041	DcSto8_Ssp3_DcSto6_W2
DCARv2_Chr3	44983085	DcSto2,DcSto6,	intergenic	LOC108213627	cytochrome P450 CYP82D47-like	DcSto6_C13_DcSto2_W3
DCARv2_Chr3	46191192	DcSto1,DcSto2,	downstream	LOC108214665	probable galacturonosyltransferase-like 7	DcSto10_I3,C9,C8_DcSto2_C2,C6
DCARv2_Chr4	5960500	DcSto6,DcSto5,	downstream	LOC108216445	pectinesterase 2-like	DcSto6_W2_DcSto5_C10
DCARv2_Chr4	6200397	DcSto6,DcSto3,	upstream	LOC108216817	squamosa promoter-binding-like protein 8	DcSto6_C12,C11_DcSto3_W7
DCARv2_Chr4	12449516	DcSto8,DcSto7b,	downstream	LOC108218488	phosphoinositide phospholipase C 2-like	DcSto8_Ssp5_DcSto7b_C3
DCARv2_Chr4	14899285	DcSto12,DcSto7b,	upstream	TRNAH-GUG	-	DcSto12_C12_DcSto7b_W7
DCARv2_Chr4	16741722	DcSto7b,DcSto12,DcSto1	downstream	LOC108217259	uncharacterized LOC108217259	DcSto12_Ssp5_DcSto1_W3_DcSto7b_C2,W5,W4
DCARv2_Chr4	18897176	DcSto1,DcSto2,	upstream	LOC108217294	geraniol 8-hydroxylase-like	DcSto10_Ssp5_DcSto2_W4
DCARv2_Chr4	21080092	DcSto3,DcSto1,	downstream	LOC108218501	probable plastid-lipid-associated protein 14, chloroplastic	DcSto3_C12,C3,W8_DcSto1_I3
DCARv2_Chr4	21436219	DcSto9,DcSto7a,	upstream	LOC108219043	ACT domain-containing protein ACR6	DcSto9_C4_DcSto7a_C3,C5
DCARv2_Chr4	23518415	DcSto6,DcSto4,	5'UTR	LOC108216062	uncharacterized LOC108216062	DcSto6_Ssp3_DcSto4_C9
DCARv2_Chr4	23725175	DcSto5,DcSto3,	downstream	LOC108218766	cell wall integrity and stress response component 3-like	DcSto5_Ssp4_DcSto3_Ssp5
DCARv2_Chr4	24005764	DcSto5,DcSto1,	downstream	LOC108218709	ATP-dependent RNA helicase DEAH11, chloroplastic-like	DcSto5_Ssp5_DcSto1_W3
DCARv2_Chr4	25101220	DcSto3,DcSto2,	upstream	LOC108218580	far upstream element-binding protein 2	DcSto3_W4_DcSto2_C2,C3,C5,C6,W6
DCARv2_Chr4	25170700	DcSto12,DcSto2,	upstream	LOC108216914	mannan endo-1,4-beta-mannosidase 5-like	DcSto12_W2_DcSto2_W7
DCARv2_Chr4	25837108	DcSto7b,DcSto2,	upstream	LOC108217805	gibberellin-regulated protein 11-like	DcSto7b_C13,C10_DcSto2_Ssp4
DCARv2_Chr4	27235613	DcSto8,DcSto1,	intron	LOC108216184	probable glutathione S-transferase	DcSto8_Ssp1_DcSto1_C13
DCARv2_Chr4	27511180	DcSto12,DcSto6,	upstream	LOC108217421	chaperone protein DnaJ-like	DcSto12_Ssp3_DcSto6_I3,I1,I2,C12,C11,C7,C1
DCARv2_Chr4	27803836	DcSto1,DcSto2,	intron	LOC108216372	protein ROOT PRIMORDIUM DEFECTIVE 1	DcSto10_Ssp4_DcSto2_W2
DCARv2_Chr4	27827324	DcSto12,DcSto6,	downstream	LOC108217950	uncharacterized LOC108217950	DcSto12_W3_DcSto6_I3,I2,C8,W3
DCARv2_Chr4	27937340	DcSto7b,DcSto1,	upstream	LOC108215680	nuclear transcription factor Y subunit C-2-like	DcSto7b_C2,C3,C5,C1,C4_DcSto1_W3
DCARv2_Chr4	29413841	DcSto12,DcSto5,	upstream	LOC108218833	bZIP transcription factor 17-like	DcSto12_W3_DcSto5_I1,C9,C12
DCARv2_Chr4	30137092	DcSto7b,DcSto7a,	downstream	LOC108218014	aluminum-activated malate transporter 8	DcSto7b_Ssp2_DcSto7a_Ssp3
DCARv2_Chr4	34603918	DcSto7b,DcSto1,	downstream	LOC108218328	uncharacterized LOC108218328	DcSto7b_C9_DcSto1_Ssp4
DCARv2_Chr4	34670462	DcSto7b,DcSto6,	upstream	LOC108216470	serine/threonine-protein kinase-like protein At3g51990	DcSto7b_W6_DcSto6_W7
DCARv2_Chr4	34950483	DcSto3,DcSto1,	upstream	LOC108215581	probable beta-1,4-xylosyltransferase IRX9H	DcSto3_W6_DcSto1_W2,Ssp3,
DCARv2_Chr4	35312078	DcSto6,DcSto2,	downstream	LOC108216395	protein DCL, chloroplastic	DcSto6_Ssp3_DcSto2_W7
DCARv2_Chr4	47839357	DcSto8,DcSto1,	intron	LOC108214355	DNA-directed RNA polymerase III subunit 2-like	DcSto8_Ssp2_DcSto1_W1
DCARv2_Chr5	1978486	DcSto7b,DcSto6,	upstream	LOC108220881	zinc finger protein 1-like	DcSto7b_C5_DcSto6_W4
DCARv2_Chr5	3583574	DcSto6,DcSto2,	upstream	LOC108223906	pentatricopeptide repeat-containing protein At5g61990, mitochondrial-like	DcSto6_W4_DcSto2_Ssp5
DCARv2_Chr5	9953172	DcSto7a,DcSto5,	downstream	LOC108220888	zeatin O-glucosyltransferase-like	DcSto7a_C6_DcSto5_I1,I2,C9,C13,C11,C10,C7,C2,C8,C5,C1
DCARv2_Chr5	9953174	DcSto12,DcSto7b,	downstream	LOC108220888	zeatin O-glucosyltransferase-like	DcSto12_Ssp3_DcSto7b_C1
DCARv2_Chr5	11315703	DcSto8,DcSto5,	upstream	LOC108221316	fasciclin-like arabinogalactan protein 1	DcSto8_W5_DcSto5_Ssp4
DCARv2_Chr5	11516006	DcSto12,DcSto7b,	downstream	LOC108221322	uncharacterized LOC108221322	DcSto12_C13,C1_DcSto7b_C2
DCARv2_Chr5	12081678	DcSto8,DcSto4,	upstream	LOC108222594	ammonium transporter 3 member 3-like	DcSto8_W4_DcSto4_C3
DCARv2_Chr5	14948096	DcSto12,DcSto2,	intron	LOC108219828	3-epi-6-deoxocathasterone 23-monooxygenase	DcSto12_C5,W7_DcSto2_C6
DCARv2_Chr5	17586534	DcSto5,DcSto2,	5'UTR	LOC108221910	transmembrane emp24 domain-containing protein p24delta3-like	DcSto5_W5,W7_DcSto2_C8
DCARv2_Chr5	21485399	DcSto6,DcSto1,	intron	LOC108224122	uncharacterized WD repeat-containing protein C2A9.03	DcSto6_Ssp4_DcSto1_W3
DCARv2_Chr5	23175965	DcSto7b,DcSto7a,	upstream	LOC108223028	uncharacterized LOC108223028	DcSto7b_W6,W5,W4_DcSto7a_Ssp3
DCARv2_Chr5	23299732	DcSto6,DcSto1,	upstream	LOC108223506	calmodulin-binding receptor-like cytoplasmic kinase 3	DcSto6_Ssp1,W2,Ssp3_DcSto1_Ssp2
DCARv2_Chr5	25322474	DcSto6,DcSto2,	upstream	LOC108223177	NADPH--cytochrome P450 reductase-like	DcSto6_C3_DcSto2_Ssp3
DCARv2_Chr5	32013134	DcSto6,DcSto1,	downstream	LOC108219912	protein trichome birefringence-like 35	DcSto6_I1,C13,Ssp4_DcSto1_W2
DCARv2_Chr5	32806925	DcSto5,DcSto2,	downstream	LOC108223530	UDP-D-apiose/UDP-D-xylose synthase 2	DcSto5_W5_DcSto2_W7
DCARv2_Chr5	32983123	DcSto12,DcSto7b,	downstream	LOC108223103	uncharacterized LOC108223103	DcSto12_W3_DcSto7b_I3,I4,C2
DCARv2_Chr5	33705725	DcSto7b,DcSto6,	upstream	LOC108220044	ATP synthase subunit d, mitochondrial-like	DcSto7b_Ssp5_DcSto6_Ssp4
DCARv2_Chr5	35563976	DcSto6,DcSto5,	upstream	LOC108219206	leishmanolysin-like peptidase	DcSto6_W1_DcSto5_W2
DCARv2_Chr5	38604731	DcSto6,DcSto2,	intron	LOC108220067	transcription factor bHLH66	DcSto6_Ssp3_DcSto2_W7
DCARv2_Chr5	38629453	DcSto3,DcSto8,DcSto2	downstream	LOC108222808	AP2/ERF and B3 domain-containing transcription factor At1g51120-like	DcSto8_W2_DcSto2_W2_DcSto3_I3,I2,C12,C7,C3,C5
DCARv2_Chr5	38931136	DcSto7b,DcSto7a,	downstream	LOC108221817	scopoletin glucosyltransferase-like	DcSto7b_C9_DcSto7a_Ssp5
DCARv2_Chr5	39320150	DcSto8,DcSto6,	downstream	LOC108223783	uroporphyrinogen-III synthase, chloroplastic	DcSto8_Ssp4_DcSto6_W2
DCARv2_Chr6	1677376	DcSto7b,DcSto7a,	intron	LOC108224849	TMV resistance protein N-like	DcSto7b_Ssp1,Ssp3_DcSto7a_C8
DCARv2_Chr6	1744146	DcSto1,DcSto7b,	upstream	LOC108224632	protein SENSITIVE TO PROTON RHIZOTOXICITY 1-like	DcSto10_W6_DcSto7b_W2
DCARv2_Chr6	2157112	DcSto6,DcSto2,	downstream	LOC108225663	ethylene-responsive transcription factor ERF039-like	DcSto6_Ssp3_DcSto2_Ssp3
DCARv2_Chr6	5397081	DcSto6,DcSto1,	upstream	LOC108226917	uncharacterized LOC108226917	DcSto6_W6,W5_DcSto1_Ssp4
DCARv2_Chr6	11271921	DcSto12,DcSto5,	upstream	LOC108225942	gibberellin 2-beta-dioxygenase 8-like	DcSto12_C11,C7,C2,C3,C1,C6,C4,Ssp4,W5,W7,W4_DcSto5_Ssp4,W3
DCARv2_Chr6	14575643	DcSto1,DcSto8,	3'UTR	LOC108224993	uncharacterized LOC108224993	DcSto10_W4_DcSto8_W2
DCARv2_Chr6	16372046	DcSto8,DcSto12,DcSto5	upstream	LOC108227542	uncharacterized LOC108227542	DcSto12_C4_DcSto5_Ssp1_DcSto8_I3,I1,I2,I4,C9,C13,C11,C10,C7,C8
DCARv2_Chr6	17032370	DcSto5,DcSto1,	downstream	LOC108225773	uncharacterized LOC108225773	DcSto5_W3_DcSto1_W2
DCARv2_Chr6	17761049	DcSto12,DcSto7b,	upstream	LOC108225737	UDP-glycosyltransferase 73C6-like	DcSto12_Ssp1_DcSto7b_W8
DCARv2_Chr6	18061094	DcSto5,DcSto8,DcSto2	downstream	LOC108192903	telomere repeat-binding factor 1	DcSto8_W2,Ssp3_DcSto2_Ssp5_DcSto5_W6
DCARv2_Chr6	20332623	DcSto6,DcSto2,	upstream	LOC108227948	serine/threonine-protein kinase HT1	DcSto6_W7_DcSto2_I3,I2,C9,C12,C8,C5,C1,W5
DCARv2_Chr6	20334897	DcSto1,DcSto6,	downstream	LOC108225100	ribosomal RNA-processing protein 8	DcSto10_I3,I2,I4,C9,C12,C7,C8,C5,W5_DcSto6_W2
DCARv2_Chr6	21338103	DcSto6,DcSto7b,DcSto2	upstream	LOC108226624	MADS-box transcription factor 6-like	DcSto7b_W7_DcSto2_W2_DcSto6_C10,W3
DCARv2_Chr6	24879098	DcSto5,DcSto3,	downstream	LOC108225166	uncharacterized LOC108225166	DcSto5_Ssp2_DcSto3_W4
DCARv2_Chr6	26166360	DcSto12,DcSto6,	upstream	LOC108226639	9-cis-epoxycarotenoid dioxygenase NCED1, chloroplastic-like	DcSto12_I3,I2,I4,C11,C10,C5,W6_DcSto6_W4
DCARv2_Chr6	27297718	DcSto6,DcSto5,	intron	LOC108227507	polyadenylate-binding protein 8-like	DcSto6_W3_DcSto5_W2
DCARv2_Chr6	27907361	DcSto6,DcSto2,	upstream	LOC108225267	cytokinin riboside 5'-monophosphate phosphoribohydrolase LOG3-like	DcSto6_W2_DcSto2_W4
DCARv2_Chr6	28472972	DcSto7b,DcSto6,	upstream	LOC108224245	uncharacterized LOC108224245	DcSto7b_C2_DcSto6_Ssp2
DCARv2_Chr6	28629542	DcSto6,DcSto5,	intron	LOC108227483	uncharacterized LOC108227483	DcSto6_C11_DcSto5_W5
DCARv2_Chr6	29708159	DcSto3,DcSto1,	downstream	LOC108225253	chaperone protein dnaJ 72	DcSto3_W7_DcSto1_W5
DCARv2_Chr6	29708585	DcSto6,DcSto2,	upstream	LOC108227266	probable vacuolar amino acid transporter YPQ2	DcSto6_C6_DcSto2_I2,C9,C10
DCARv2_Chr6	29844277	DcSto7b,DcSto7a,	upstream	LOC108224626	ABSCISIC ACID-INSENSITIVE 5-like protein 2	DcSto7b_C9_DcSto7a_C10
DCARv2_Chr6	34226504	DcSto6,DcSto2,	downstream	LOC108224841	nuclear pore complex protein NUP43	DcSto6_W5_DcSto2_I1,I2,C11
DCARv2_Chr6	35211426	DcSto2,DcSto1,	upstream	LOC108228152	ultraviolet-B receptor UVR8	DcSto2_W1_DcSto1_C5,C6,
DCARv2_Chr6	40836547	DcSto6,DcSto2,	upstream	LOC108222178	uncharacterized LOC108222178	DcSto6_W2_DcSto2_C12
DCARv2_Chr7	5404750	DcSto8,DcSto6,	intron	LOC108196562	T-complex protein 1 subunit eta-like	DcSto8_W2_DcSto6_C3
DCARv2_Chr7	9081218	DcSto1,DcSto6,	upstream	LOC108193508	myosin heavy chain kinase B	DcSto10_W6_DcSto6_W4
DCARv2_Chr7	9244314	DcSto8,DcSto7b,	upstream	LOC108196255	adenosylhomocysteinase	DcSto8_C2,W5_DcSto7b_I3,C12,C2,C6
DCARv2_Chr7	9877967	DcSto8,DcSto6,	upstream	LOC108193258	spermidine synthase 1-like	DcSto8_Ssp4_DcSto6_I3
DCARv2_Chr7	14794386	DcSto6,DcSto2,	upstream	LOC108195707	high mobility group B protein 15-like	DcSto6_W4_DcSto2_W3
DCARv2_Chr7	15444635	DcSto7b,DcSto12,DcSto5	upstream	LOC108194276	uncharacterized LOC108194276	DcSto12_W2_DcSto5_W1,W2_DcSto7b_W6
DCARv2_Chr7	16085682	DcSto6,DcSto5,	upstream	LOC108196571	CASP-like protein 1	DcSto6_C9,C10,C6,C4_DcSto5_W3
DCARv2_Chr7	23987104	DcSto7a,DcSto3,	upstream	LOC108194315	probable carboxylesterase 8	DcSto7a_C1_DcSto3_I2
DCARv2_Chr7	24266429	DcSto7a,DcSto6,	downstream	LOC108194349	uncharacterized LOC108194349	DcSto7a_W1_DcSto6_W1
DCARv2_Chr7	27563131	DcSto7a,DcSto2,	intron	LOC108196753	serine-threonine kinase receptor-associated protein-like	DcSto7a_C12,C6_DcSto2_Ssp2
DCARv2_Chr7	27643017	DcSto7b,DcSto6,	upstream	LOC108193438	acyl-protein thioesterase 2-like	DcSto7b_C10,C7_DcSto6_C3
DCARv2_Chr7	27723228	DcSto12,DcSto5,	upstream	LOC108193872	metallothiol transferase FosB-like	DcSto12_C1,W8,W6,W3_DcSto5_W8,W5
DCARv2_Chr7	31051353	DcSto6,DcSto4,	intron	LOC108196085	protein CROWDED NUCLEI 4-like	DcSto6_Ssp4_DcSto4_W3
DCARv2_Chr7	33100063	DcSto6,DcSto2,	upstream	LOC108193655	transcription factor bHLH79-like	DcSto6_W2_DcSto2_Ssp5
DCARv2_Chr7	35464599	DcSto12,DcSto5,	5'UTR	LOC108227779	CCR4-NOT transcription complex subunit 11-like	DcSto12_Ssp1_DcSto5_W2
DCARv2_Chr8	4147013	DcSto7a,DcSto6,	upstream	LOC108199350	pumilio homolog 5-like	DcSto7a_I3_DcSto6_W5
DCARv2_Chr8	5008468	DcSto1,DcSto6,	downstream	LOC108198052	uncharacterized LOC108198052	DcSto10_I3,I1,C9,C13,C10,C7,C8,C3,C5,C4,W8_DcSto6_C9,C12,C7
DCARv2_Chr8	11096862	DcSto6,DcSto1,	intron	LOC108199584	lysine-specific demethylase JMJ25-like	DcSto6_W7_DcSto1_C12
DCARv2_Chr8	15842912	DcSto5,DcSto3,	upstream	LOC108197456	7-deoxyloganetin glucosyltransferase-like	DcSto5_C11_DcSto3_W4
DCARv2_Chr8	21264481	DcSto12,DcSto7b,	upstream	LOC108199609	scarecrow-like protein 9	DcSto12_W2_DcSto7b_C5
DCARv2_Chr8	26635359	DcSto6,DcSto5,	upstream	LOC108198849	major allergen Dau c 1-like	DcSto6_W2_DcSto5_C1
DCARv2_Chr8	26684467	DcSto7b,DcSto2,	upstream	LOC108198848	major allergen Dau c 1	DcSto7b_Ssp3_DcSto2_W4
DCARv2_Chr8	27822655	DcSto7a,DcSto2,	downstream	LOC108197458	ATP-dependent Clp protease proteolytic subunit 2, mitochondrial	DcSto7a_C10,C3,C6,C4,W6,W5_DcSto2_W4
DCARv2_Chr8	29721100	DcSto6,DcSto2,	upstream	LOC108197700	truncated transcription factor CAULIFLOWER A-like	DcSto6_C2_DcSto2_W7
DCARv2_Chr8	35514481	DcSto6,DcSto5,	upstream	LOC108195080	uncharacterized LOC108195080	DcSto6_W4_DcSto5_Ssp5
DCARv2_Chr9	2301534	DcSto8,DcSto4,	downstream	LOC108201880	uncharacterized LOC108201880	DcSto8_Ssp1_DcSto4_W2
DCARv2_Chr9	6391227	DcSto7b,DcSto5,	downstream	LOC108202860	uncharacterized protein DDB_G0290685	DcSto7b_C2,C5,W8_DcSto5_Ssp1
DCARv2_Chr9	6665897	DcSto5,DcSto2,	downstream	LOC108201180	UPF0481 protein At3g47200-like	DcSto5_C9_DcSto2_W4
DCARv2_Chr9	6920906	DcSto6,DcSto1,	downstream	LOC108203067	tRNA wybutosine-synthesizing protein 4	DcSto6_Ssp3_DcSto1_Ssp1
DCARv2_Chr9	11965067	DcSto7b,DcSto6,	intron	LOC108201279	dual specificity protein phosphatase PHS1-like	DcSto7b_I3_DcSto6_I1
DCARv2_Chr9	22332805	DcSto12,DcSto5,	upstream	LOC108200880	heat shock cognate 70 kDa protein-like	DcSto12_W2_DcSto5_W3
DCARv2_Chr9	22558158	DcSto6,DcSto5,	upstream	LOC108200537	probable peroxygenase 4	DcSto6_Ssp4_DcSto5_W5
DCARv2_Chr9	26366298	DcSto8,DcSto6,	5'UTR	LOC108200517	vesicle-associated membrane protein 724	DcSto8_Ssp3_DcSto6_Ssp3
DCARv2_Chr9	29030784	DcSto6,DcSto2,	downstream	LOC108200261	uncharacterized LOC108200261	DcSto6_Ssp3_DcSto2_I3,I4,Ssp5
DCARv2_Chr9	29084039	DcSto5,DcSto2,	upstream	LOC108200837	uncharacterized LOC108200837	DcSto5_Ssp4_DcSto2_Ssp2
DCARv2_Chr9	30684698	DcSto7b,DcSto5,	downstream	LOC108197186	probable galacturonosyltransferase-like 9	DcSto7b_C13_DcSto5_W2
DCARv2_Chr9	32729735	DcSto5,DcSto2,	downstream	LOC108200489	dual-specificity RNA methyltransferase RlmN	DcSto5_W3_DcSto2_W2
DCARv2_Chr9	33477875	DcSto6,DcSto5,	upstream	LOC108201837	endoplasmic reticulum metallopeptidase 1	DcSto6_W2_DcSto5_C2
